# Supplementary material for: Alcohol expenditure in grocery stores and their associations with tobacco and food expenditures
Source: Springer Nature journal article supplement (doi:10.1186/s12889-019-7096-3), 2019-06-20
Supplement: MOESM1 [file 16838508]

Additional file 1: Regrouping of the original food variables in the purchase data of the LoCard project, 2016

| <b>Food groups used in analyses</b> | <b>Original food variables</b>                       |
|-------------------------------------|------------------------------------------------------|
| Baby foods                          | Baby foods                                           |
| Baking products and ingredients     | Ingredients for baking and gelatinizing, breadcrumbs |
|                                     | Other flours and ingredients                         |
|                                     | Preservatives                                        |
|                                     | Starches                                             |
|                                     | Baker's yeast                                        |
| Beef and pork                       | Beef                                                 |
|                                     | Pork                                                 |
| Berries                             | Forest berries                                       |
|                                     | Garden berries and rhubarb                           |
| Breakfast cereals                   | Breakfast cereals                                    |
| Butter, margarine and spreads       | Butter, margarine and spreads                        |
| Canned fish                         | Canned fish                                          |
| Canned foods                        | Canned foods                                         |
| Canned fruits and berries           | Canned fruits and berries                            |
| Canned herrings, roe                | Roe                                                  |
|                                     | Canned herrings                                      |
| Canned vegetables                   | Canned vegetables                                    |
| Cheese                              | Cheese                                               |
| Chewing gum                         | Chewing gum                                          |
| Chocolate                           | Chocolate                                            |
| Cocoa                               | Cocoa                                                |
| Coffee                              | Coffee                                               |
|                                     | Instant coffee                                       |
| Confectionery                       | Confectionery                                        |
| Cookies, rusks and bagels           | Cookies                                              |
|                                     | Rusks and bagels                                     |
| Desserts                            | Desserts                                             |
|                                     | Milk-based desserts                                  |
| Dietary supplements                 | Natural products VAT17 %                             |
|                                     | Natural products VAT22 %                             |
|                                     | Health salts                                         |
| Dried bread                         | Dried bread                                          |
| Eggs                                | Eggs                                                 |
| Fish products and frozen fish       | Frozen fish and shellfish                            |
|                                     | Other fish products                                  |
|                                     | Smoked fish                                          |
|                                     | Salted fish                                          |
|                                     | Fresh fish                                           |
| Fresh-baked bread                   | Fresh-baked bread                                    |

|                                |                                               |
|--------------------------------|-----------------------------------------------|
| Frozen fruits and berries      | Frozen fruits, berries and juices             |
| Frozen potato products         | Frozen potato products                        |
| Frozen vegetables              | Frozen vegetables                             |
| Fruit                          | Bananas                                       |
|                                | Stone fruits                                  |
|                                | Other fruits                                  |
|                                | Apples                                        |
|                                | Pears                                         |
|                                | Grapes                                        |
|                                | Citrus fruits                                 |
| Ice cream                      | Ice cream                                     |
| Jam, marmalade and jelly       | Jam                                           |
|                                | Marmalade and jelly                           |
| Juice drinks                   | Juice concentrates and powders, sports drinks |
|                                | Sweetened juice drinks                        |
|                                | Juice drinks                                  |
| Juices and nectars             | Juices and nectars                            |
| Liver and other organ meats    | Organ meats                                   |
|                                | Liver products                                |
| Meal and stock ingredients     | Meal and stock ingredients                    |
|                                | Ingredients for mashed potato                 |
| Meat products                  | Meat products                                 |
|                                | Frozen meat products                          |
|                                | Semi-finished meat products                   |
|                                | Meat preservatives                            |
|                                | Smoked meat products                          |
| Milk and cream                 | Milk and cream                                |
|                                | Milk and cream powder                         |
| Mushroom                       | Cultivated mushroom                           |
|                                | Forest mushroom                               |
| Mutton, horse and game         | Mutton                                        |
|                                | Other meat                                    |
|                                | Game                                          |
| Nuts, dried fruits and berries | Dried fruits and berries                      |
|                                | Nuts and almonds                              |
| Other sour milk products       | Other sour milk products (than yoghurt)       |
| Pastes                         | Pastes                                        |
| Pastries                       | Pastries                                      |
|                                | In-store bakery                               |
|                                | Frozen pastries                               |
|                                | Other bakery products                         |
| Pickled cucumber and beetroot  | Pickled cucumber and beetroot                 |
| Potato                         | Potato                                        |
| Poultry                        | Frozen poultry products                       |

|                        |                                          |
|------------------------|------------------------------------------|
|                        | Poultry                                  |
| Ready-to-eat foods     | Convenience foods                        |
|                        | Ready-to-eat bakery products             |
|                        | Other ready foods                        |
|                        | Packed fast food                         |
|                        | Packed ready-to-eat-foods                |
|                        | Ready-to-eat foods from service counter  |
|                        | Frozen meals                             |
| Ready-to-eat salads    | Packed ready-to-eat salads               |
|                        | Ready-to-eat salads from service counter |
| Rice and pasta         | Pasta                                    |
|                        | Rice                                     |
| Rolled cereals, groats | Rolled cereals                           |
|                        | Groats                                   |
| Root vegetables        | Root vegetables                          |
| Rye flour              | Rye flour                                |
| Sauces and mayonnaise  | Sauces and mayonnaise                    |
|                        | Mustard                                  |
| Sausages               | Cured sausages                           |
|                        | Cold-cut sausage bars                    |
|                        | Cold-cut sausage slices                  |
|                        | Sausages                                 |
| Seeds and legumes      | Other grain products                     |
| Shellfish and molluscs | Preserved shellfish and molluscs         |
|                        | Shellfish and molluscs                   |
| Snacks                 | Snacks                                   |
| Soft drinks and waters | Soft drinks and waters                   |
| Spices                 | Vinegars                                 |
|                        | Spices                                   |
|                        | Salts                                    |
| Sugars and honey       | Honey                                    |
|                        | Treacle                                  |
|                        | Sugars                                   |
| Sweeteners             | Sweeteners                               |
| Sweets                 | Sweets, special VAT 22%                  |
|                        | Liquorice                                |
|                        | Bags of candy                            |
|                        | Other sweets                             |
|                        | Candy boxes                              |
| Tea and herbal drinks  | Tea and herbal drinks                    |
| Texmex products        | Texmex products                          |
| Vegetable oils         | Vegetable oils                           |
| Vegetables             | Herbs and pulses                         |
|                        | Salads                                   |
|                        | Salad mixes                              |

|             |             |
|-------------|-------------|
|             | Vegetables  |
| Wheat flour | Wheat flour |
| Yoghurt     | Yoghurt     |
